# Supplementary material for: Fluorescence lifetime-based pH sensing by platinum nanoclusters
Source: Royal Society of Chemistry journal article supplement (doi:10.1039/c9an00061e), 2019-01-01
Supplement: c9an00061e1.pdf [file c9an00061e1.pdf]

# Supporting Information

## Fluorescence lifetime-based pH sensing by Platinum Nanoclusters

Lihua Jin,<sup>a\*</sup> Lulu Shi<sup>a</sup>, Wenjuan Shi<sup>a</sup>, Zheng Meng<sup>a</sup>, Li Shang<sup>b\*</sup> and Yehua Shen<sup>a</sup>

a. Key Laboratory of Synthetic and Natural Functional Molecule Chemistry of the Ministry of Education, College of Chemistry & Materials Science, Northwest University, Xi'an 710127, China

b. State Key Laboratory of Solidification Processing, Center for Nano Energy Materials, School of Materials Science and Engineering, Northwestern Polytechnical University, Xi'an 710072, China

**Table S1.** Lifetimes and normalized pre-exponentials of Pt NCs at different pH values

| PH=3.12     |           | PH=4.30     |           | PH=5.18     |           | PH=5.58     |           |
|-------------|-----------|-------------|-----------|-------------|-----------|-------------|-----------|
| $\tau$ (ns) | pre-expon |
| 21.0137     | 0.9116    | 21.1251     | 0.8976    | 20.9394     | 0.8924    | 19.7137     | 0.8977    |
| 3.5539      | 0.0884    | 3.8493      | 0.1024    | 3.5778      | 0.1076    | 3.2658      | 0.1023    |
| PH=6.03     |           | PH=6.31     |           | PH=6.62     |           | PH=6.81     |           |
| $\tau$ (ns) | pre-expon |
| 19.2245     | 0.8712    | 17.8839     | 0.8611    | 16.2527     | 0.8428    | 14.9474     | 0.8166    |
| 3.5389      | 0.1288    | 3.3102      | 0.1389    | 3.2435      | 0.1527    | 3.1225      | 0.1834    |
| PH=7.18     |           | PH=7.54     |           | PH=7.88     |           | PH=8.44     |           |
| $\tau$ (ns) | pre-expon |
| 13.3660     | 0.7647    | 12.2624     | 0.7191    | 11.3411     | 0.7049    | 11.1339     | 0.6509    |
| 3.0706      | 0.2353    | 3.0425      | 0.2809    | 2.6488      | 0.2951    | 3.02220     | 0.3491    |
| PH=9.09     |           |             |           |             |           |             |           |
| $\tau$ (ns) | pre-expon |             |           |             |           |             |           |
| 10.3736     | 0.6544    |             |           |             |           |             |           |
| 2.6337      | 0.3456    |             |           |             |           |             |           |

\* To whom correspondence should be addressed. Fax: +86-029-88302635. E-mail: [jinlihua@nwu.edu.cn](mailto:jinlihua@nwu.edu.cn).

\* To whom correspondence should be addressed. Fax: +86-029-88460204. E-mail: [li.shang@nwpu.edu.cn](mailto:li.shang@nwpu.edu.cn)

**Table S2.** Comparison of different methods for the determination of pH

| Probe                                            | Analytical signal      | pH Linear range  | Reference |
|--------------------------------------------------|------------------------|------------------|-----------|
| Functionalized Tristyrylbenzene                  | Fluorescence lifetime  | 1.3-3.2, 5.7-7.2 | 1         |
| N-hydroxyethyl-aminoethyl -<br>Perylene Bisimide | Fluorescence lifetime  | 6-8              | 2         |
| Anionic Perylene Bisimide                        | Fluorescence lifetime  | 4.4-8.0          | 3         |
| CdSe/ZnS QDs                                     | Fluorescence lifetime  | 5.2-6.9          | 4         |
| Pt NCs                                           | Fluorescence lifetime  | 6.02-7.54        | This work |
| DHLA-Ag NCs                                      | Fluorescence intensity | 4.0-8.0          | 5         |
| Grapheme quantum dots                            | Fluorescence intensity | 1.81-8.96        | 6         |
| AuCu NCs                                         | Fluorescence intensity | 3.0-7.0          | 7         |
| N-acetyl-L-cysteine AuNCs                        | Fluorescence intensity | 6.05-6.40        | 8         |
| Cy3-A <sub>20</sub> -BHQ2                        | Fluorescence intensity | 3.4-6.1          | 9         |
| Zr-MOFs                                          | Fluorescence intensity | 1-8              | 10        |
| Carbon nanoparticles                             | Fluorescence intensity | 5.25-6.75        | 11        |

## References

- [1] P. J. P. Liñán, A. Garzon, J. Tolosa, I. Bravo, V. J. Canales, L. J. Rodríguez, J. Albaladejo, M. J. C. Garcia, *J. Phys. Chem. C*, 2016, **120**, 18771-18779.
- [2] P. J. P. Liñán, M. Moral, M. L. Nueda, R. C. Sánchez, J. F. Sainz, A. G. Ruiz, I. Bravo, M. Melguizo, J. Laborda, J. Albaladejo, *J. Phys. Chem. C* 2017, **121**, 24786-24797.
- [3] D. Aigner, R. I. Dmitriev, S. M. Borisov, D. B. Papkovskyb and I. Klimanta, *J. Mater. Chem. B*, 2014, **2**, 6792-6801.
- [4] M. J. R. Rama, A. Orte, E. A. H. Hall, J. M. A. Pez, E. M. Talavera, *Chem. Commun.*, 2011, **47**, 2898-2900.
- [5] H. Xiong, H. Zheng, W. Wang, J. Liang, W. Wen, X. Zhang and S. Wang, *Biosens. Bioelectron.*, 2016, **86**, 164-168.
- [6] Z. Wu, M. Gao, T. Wang, X. Wan, L. Zheng and C. Huang, *Nanoscale*, 2014, **6**, 3868-3874.
- [7] P. Chen, J. Ma, L. Chen, G. Lin, C. Shih, T. Lin and H. Chang, *Nanoscale*, 2014, **6**, 3503-3507.
- [8] H. Deng, G. Wu, Z. Zou, H. Peng, A. Liu, X. Lin, X. Xia and W. Chen, *Chem. Commun.*, 2015, **51**, 7847-7850.
- [9] K. Yu, W. Tseng, M. Wu, A. S. K. K. Alagarsamy, W. Tsenga, P. Lina, *Sens. Actuators B Chem.*, 2018, **273**, 681-688.
- [10] X.L. Lv, L.H. Xie, B. Wang, M.J. Zhao, Y.J. Cui and J.R. Li, *J. Mater. Chem. C*, 2018, **6**, 10628-10639
- [11] L. Li, L. Shi, Y. Zhang, G. Zhang, C. Zhang, C. Dong, H. Yu, S. Shuang, *Talanta*, 2019, **196**, 109-116.
